# Supplementary material
Source: PubMed Central journal article supplement (PMC6162094)
Supplement: NIHMS1502823-supplement-1.pdf [file NIHMS1502823-supplement-1.pdf]

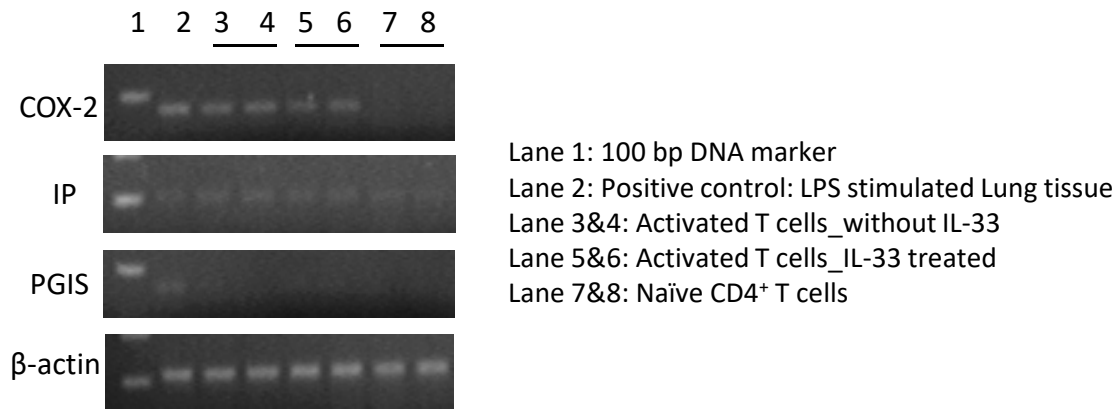

**Fig. S1. Activated CD4 T cells expressed COX-2 and IP, but not PGI<sub>2</sub> synthase (PGIS).** Naïve CD4 T cells were activated with anti-CD3 and anti-CD28 in the absence or presence of IL-33 for 3 days. The cells were harvested and cellular mRNA was prepared for RT-PCR analyses of target gene expression.

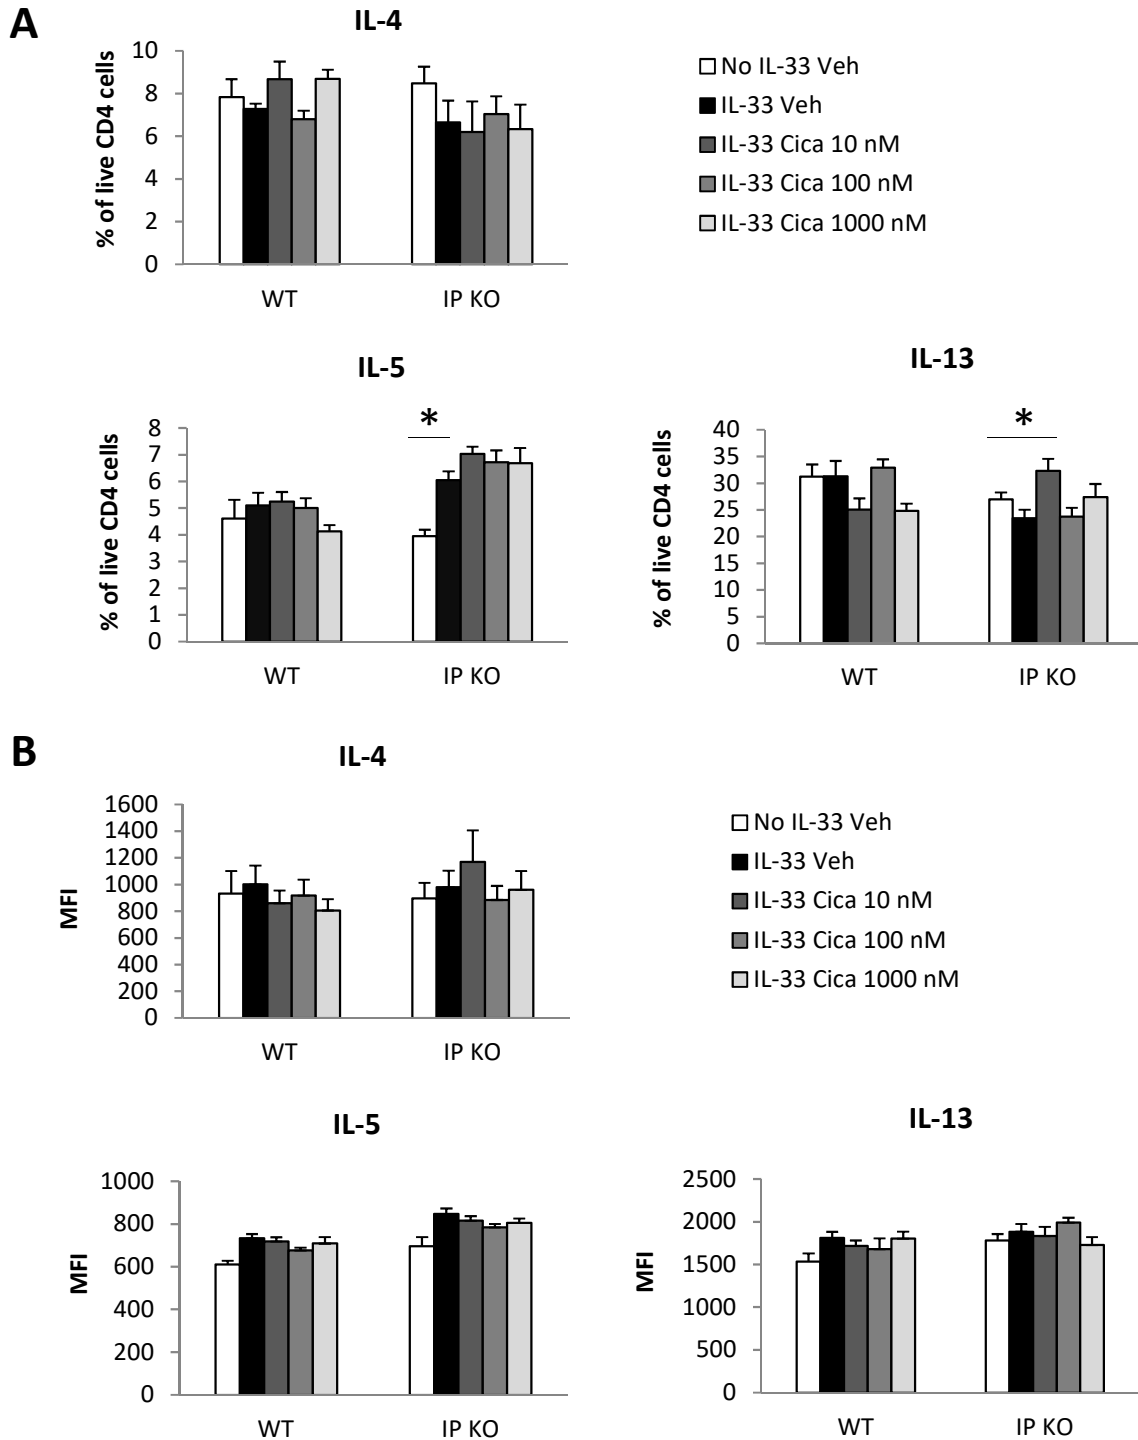

**Fig. S2. Cicaprost did not change the percentage and mean fluorescence intensity (MFI) of IL-4, IL-5 and IL-13 in CD4<sup>+</sup> T cells.** Naïve CD4<sup>+</sup> T cells from WT and IP KO mice were stimulated with anti-CD3 and anti-CD28 Abs in the absence or presence of IL-33 and treated with vehicle or cicaprost for 3 days. The cells were then stimulated with PMA and ionomycin in the presence of GolgiStop for 4h before stained and analyzed by flow cytometry. The cells were gated for lymphocytes, single cells, and live cells for analyses of IL-4, IL-5, or IL-13 expression. A. The percentages of IL-4<sup>+</sup>CD4<sup>+</sup>, IL-5<sup>+</sup>CD4<sup>+</sup>, and IL-13<sup>+</sup>CD4<sup>+</sup> cells. B. MFI of IL-4, IL-5 or IL-13. Data are combined of 2 experiments and presented as mean  $\pm$  SEM. \*,  $p < 0.05$ ,  $n=6$ .
